# Supplementary material for: Capturing the temporal evolution of choice across prefrontal cortex
Source: eLife journal article supplement (doi:10.7554/elife.11945), 2015-12-11

**PC2 circular-linear correlation with oscillation phase**

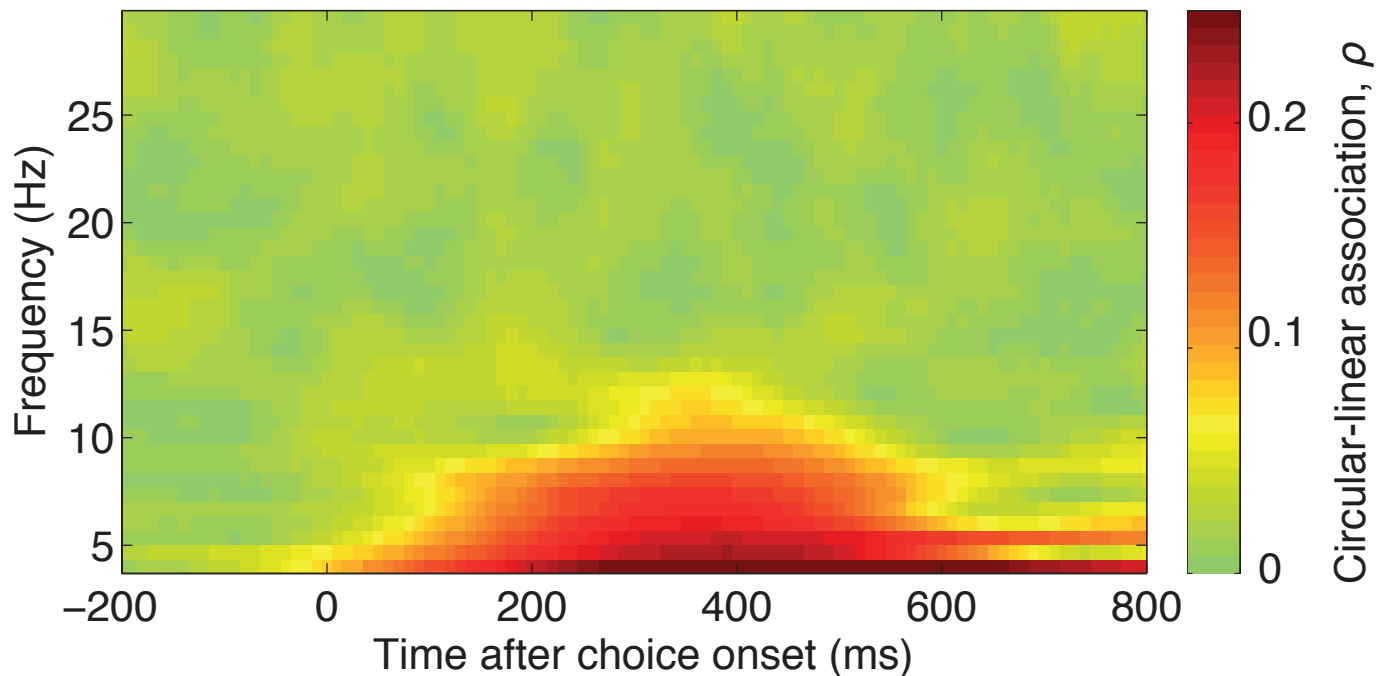

**PC2 linear correlation with log(oscillation power)**

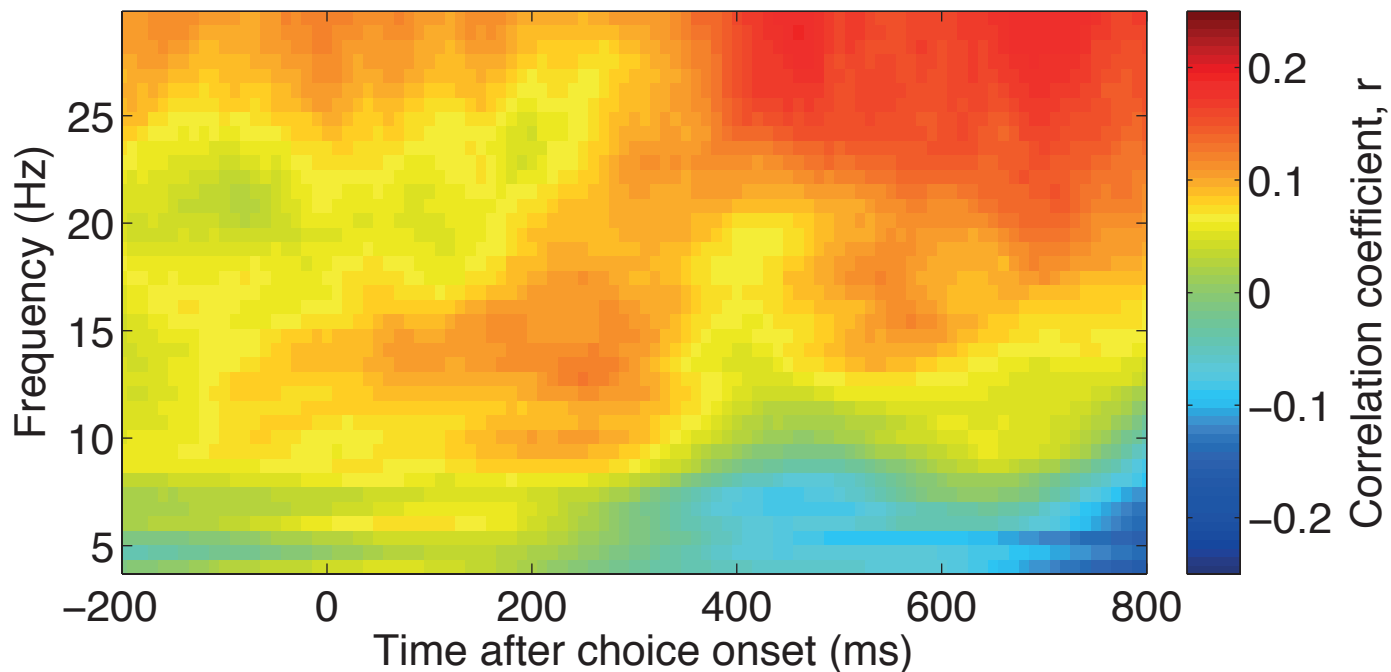

Supplement: supp [file elife_poa_e11945_Figure_2_figure_supplement_3.pdf › elife_poa_e11945_Figure_2_figure_supplement_3.pdf]
