# Supplementary material for: Capturing the temporal evolution of choice across prefrontal cortex
Source: eLife journal article supplement (doi:10.7554/elife.11945), 2015-12-11

ACC LFP onto DLPFC firing, effort trials

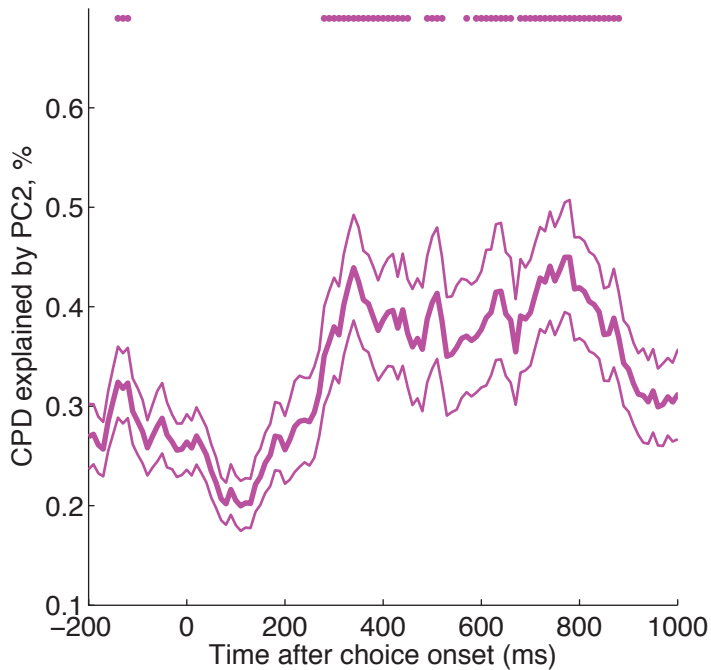

ACC LFP onto DLPFC firing, delay trials

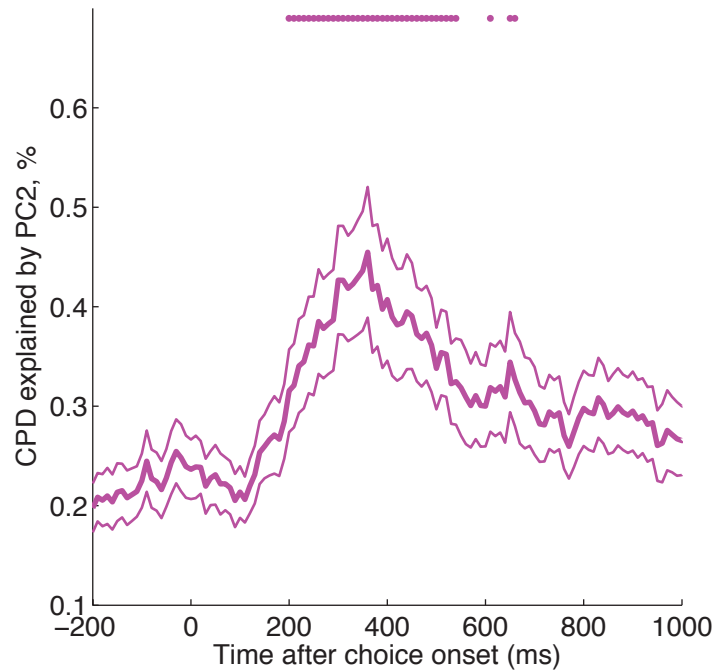

OFC LFP onto DLPFC firing, effort trials

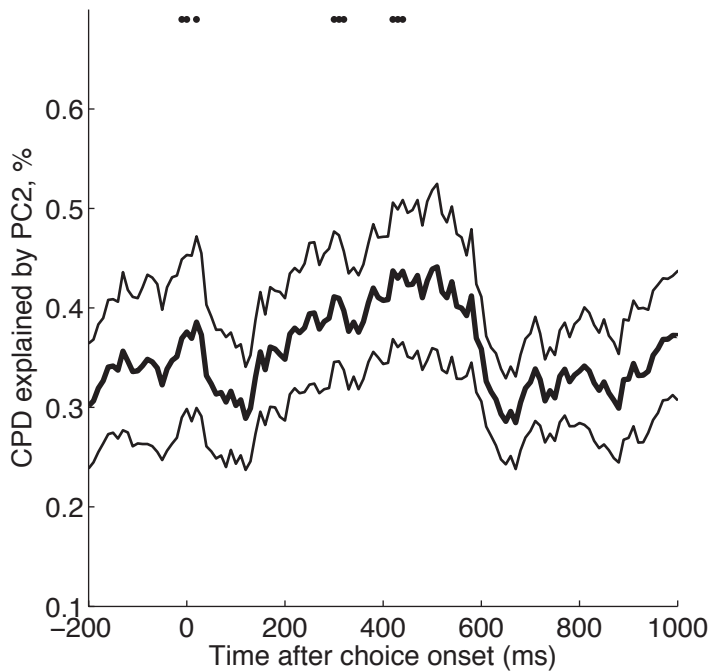

OFC LFP onto DLPFC firing, delay trials

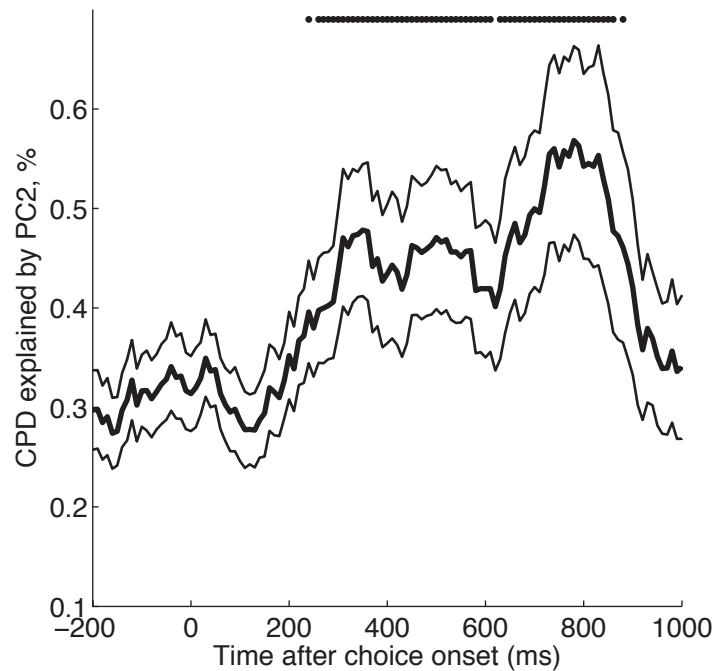

Supplement: supp [file elife_poa_e11945_Figure_5_figure_supplement_1.pdf › elife_poa_e11945_Figure_5_figure_supplement_1.pdf]
