# Supplementary figures and images for: Capturing the temporal evolution of choice across prefrontal cortex
Source: eLife journal article supplement (doi:10.7554/elife.11945), 2015-12-11

**DLPFC (n=303 neurons)**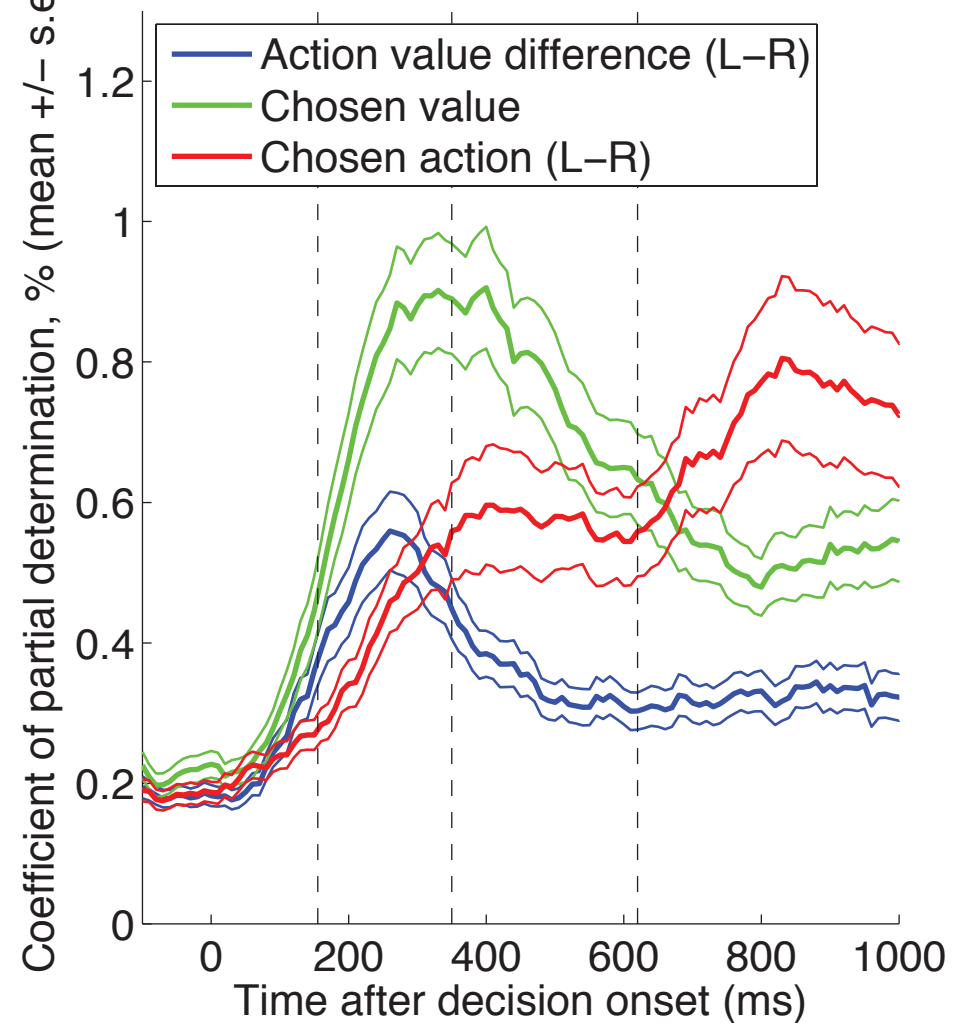**OFC (n=212 neurons)**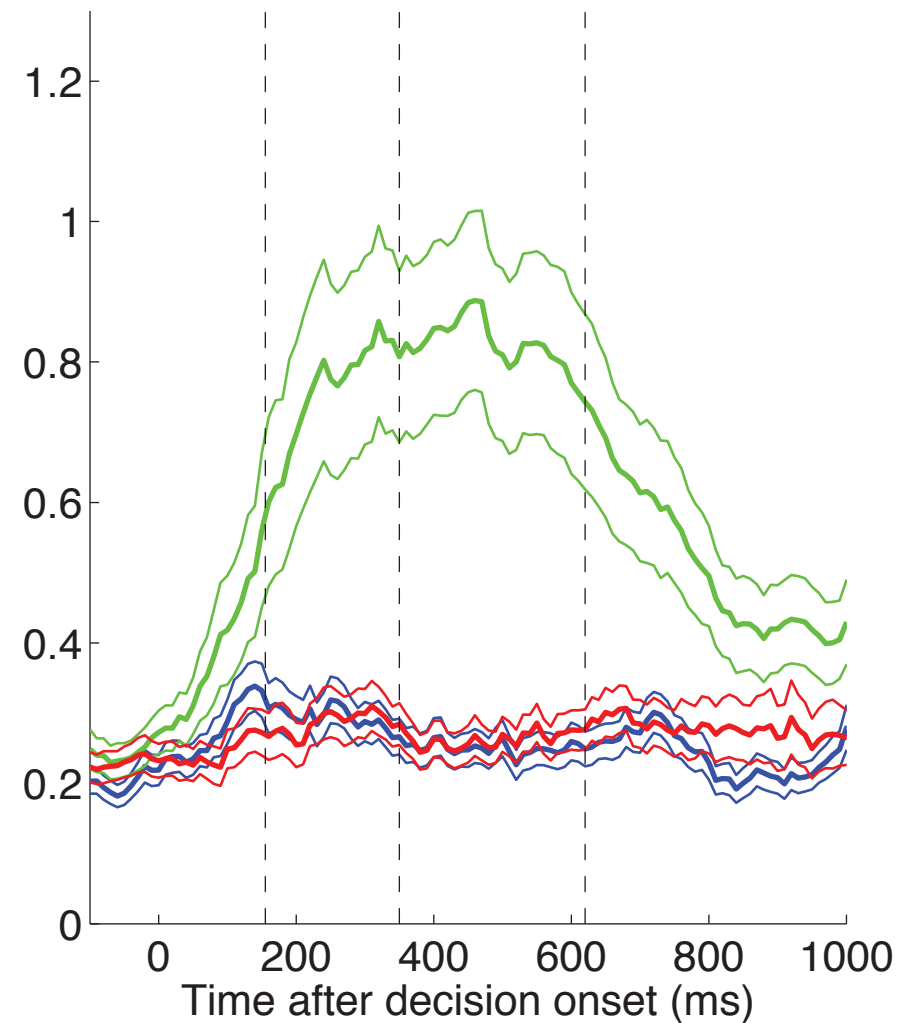**ACC (n=321 neurons)**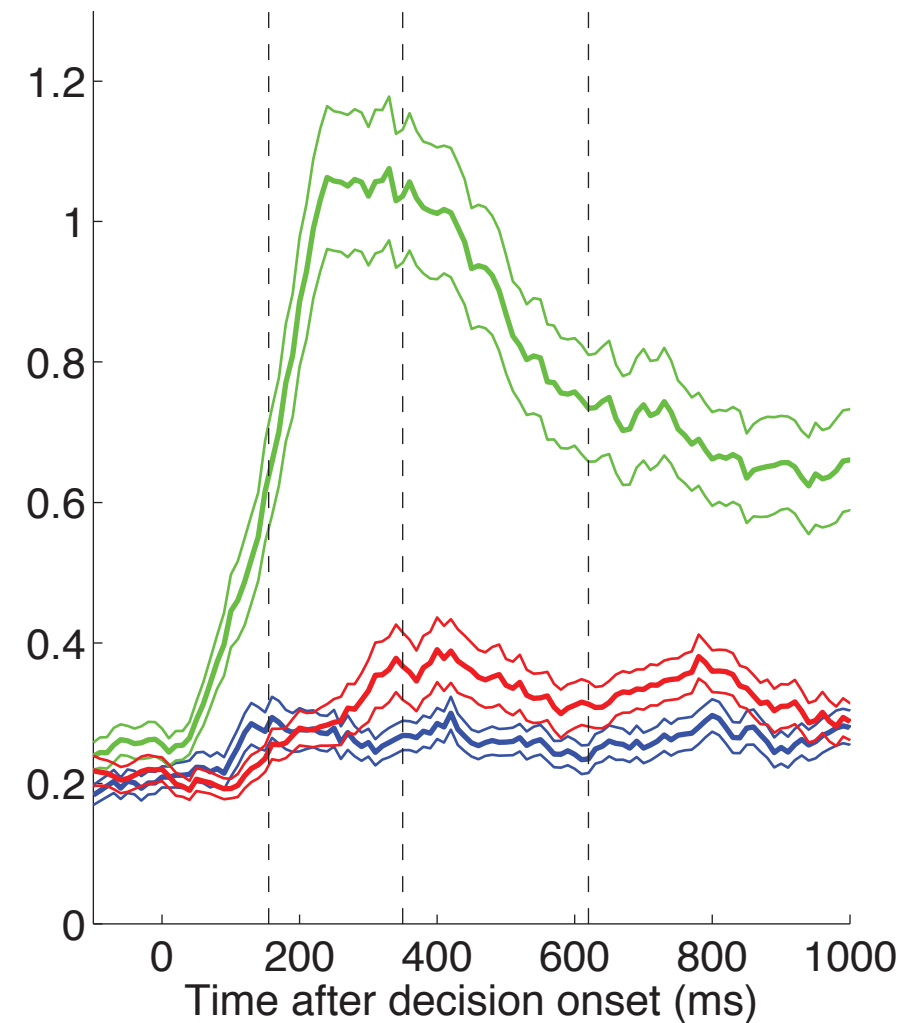

Supplement: supp [file elife_poa_e11945_Figure_1_figure_supplement_1.pdf › elife_poa_e11945_Figure_1_figure_supplement_1.pdf]

**Monkey B**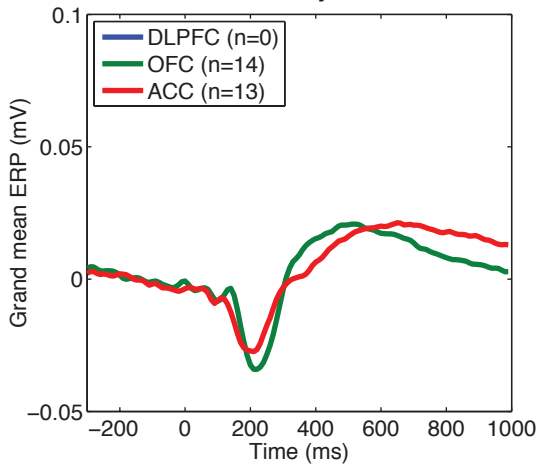**Monkey E**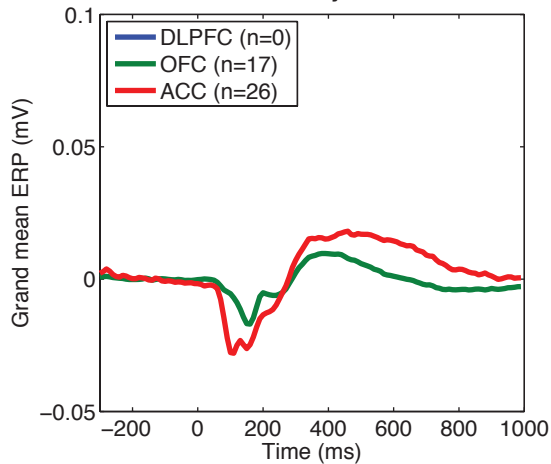**Monkey N**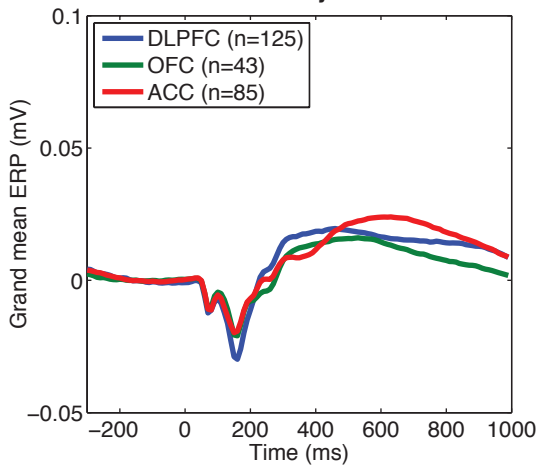**Monkey K (free saccade)**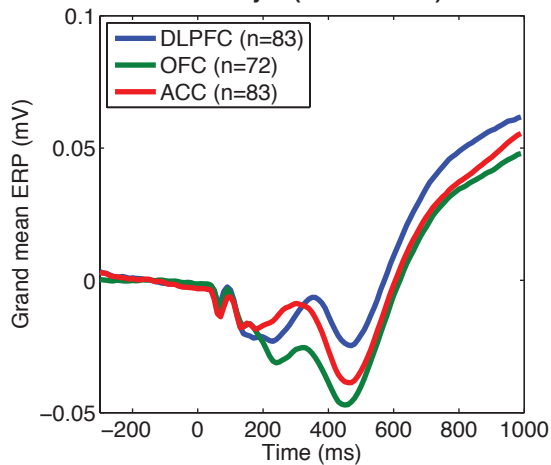

Supplement: supp [file elife_poa_e11945_Figure_1_figure_supplement_2.pdf › elife_poa_e11945_Figure_1_figure_supplement_2.pdf]

**A**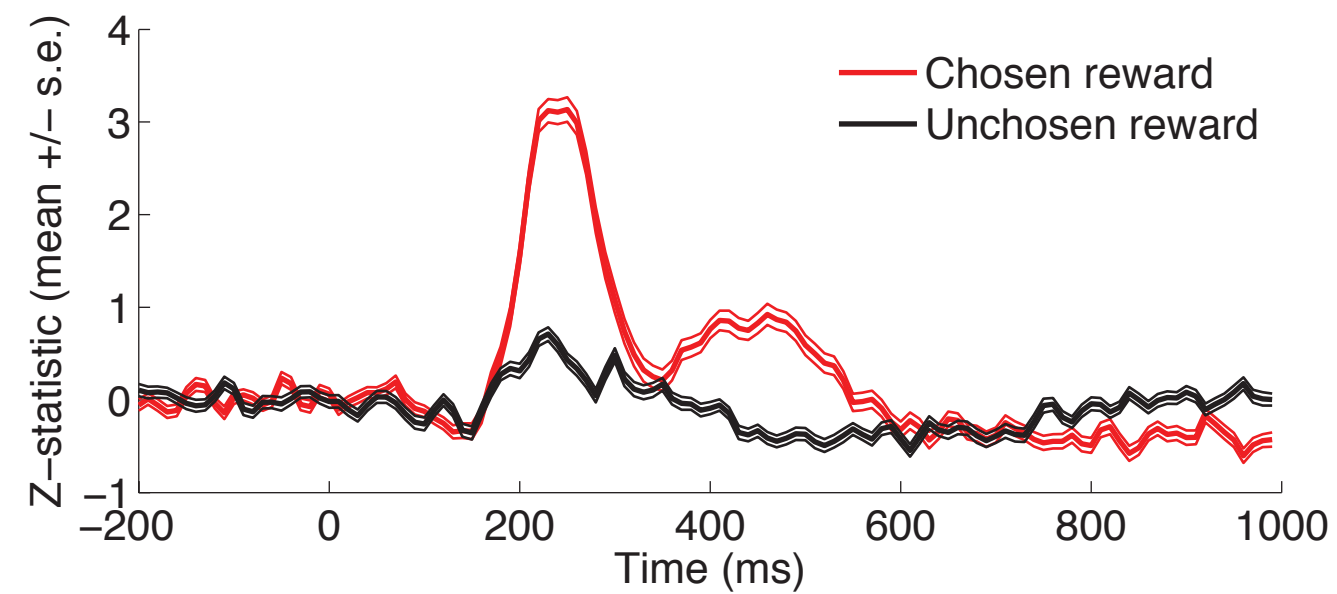**B**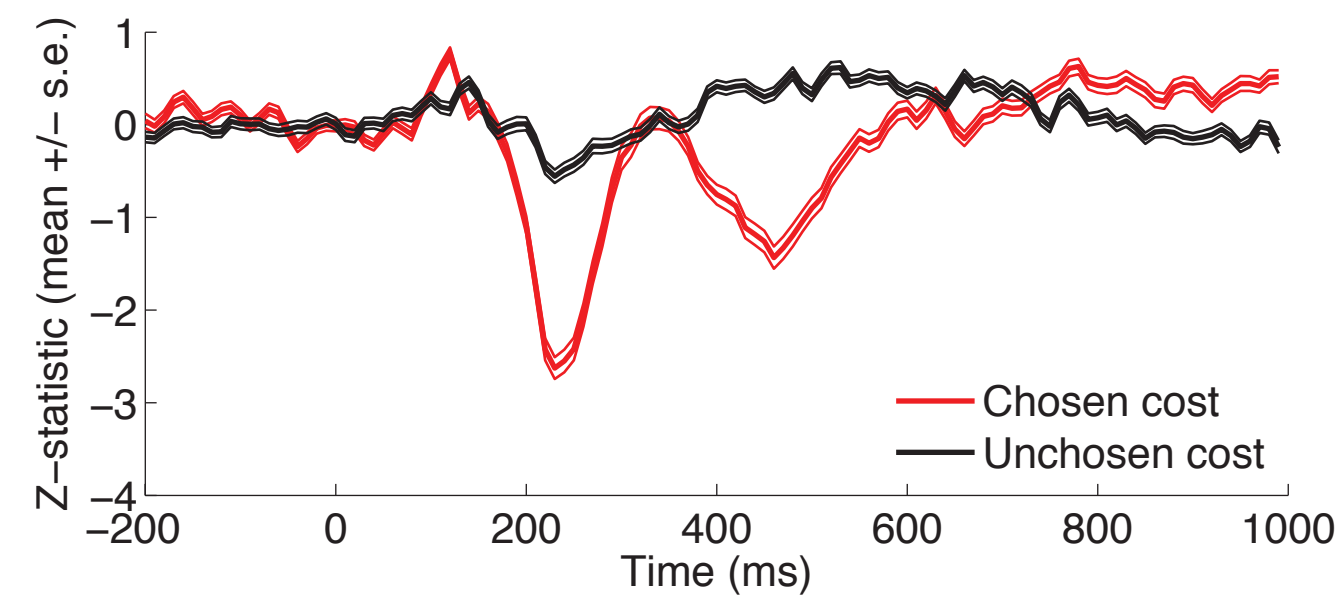**C****DLPFC**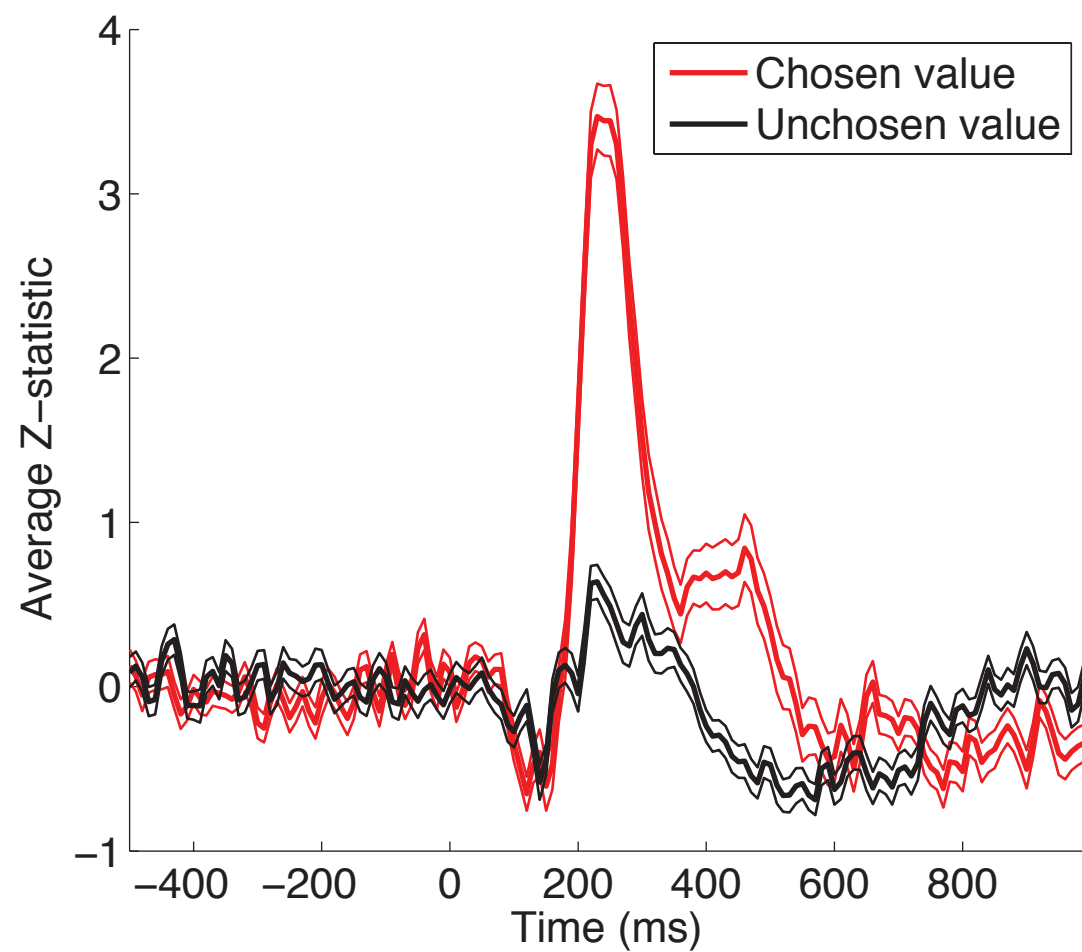**OFC**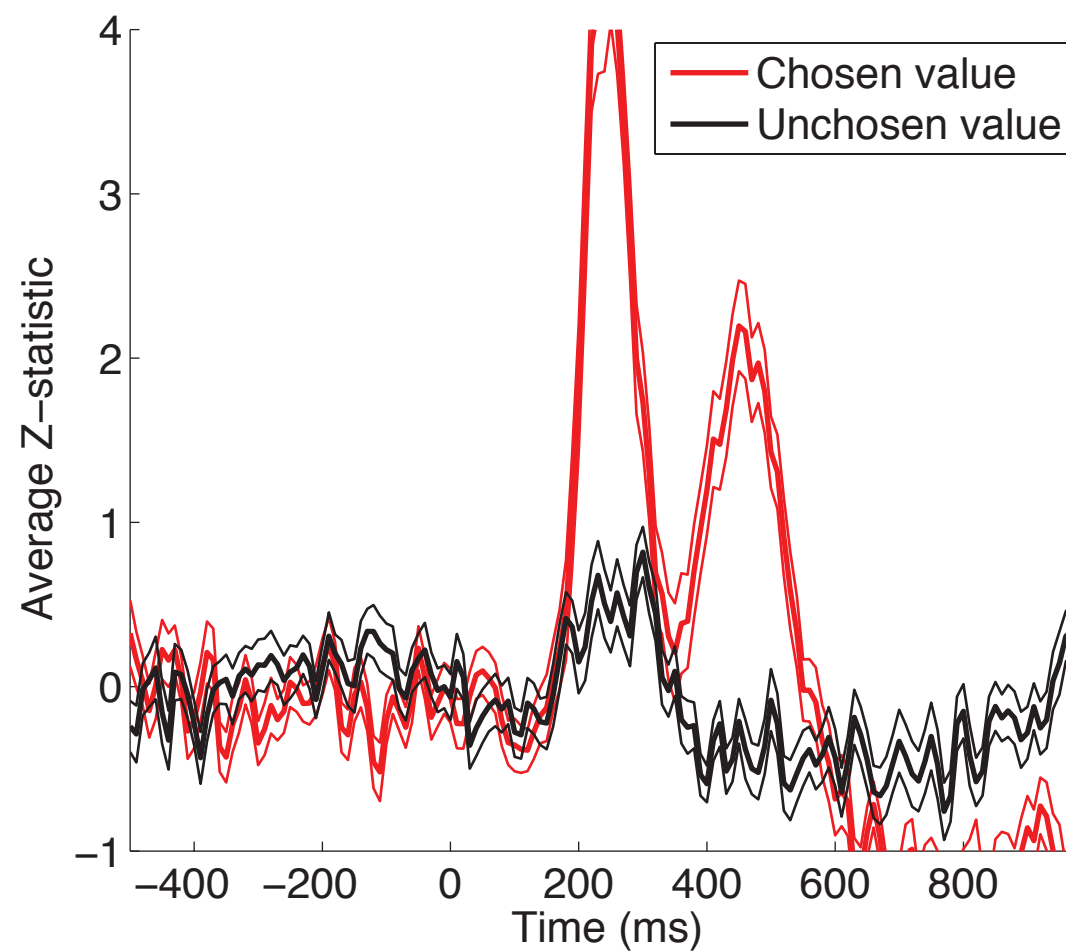**ACC**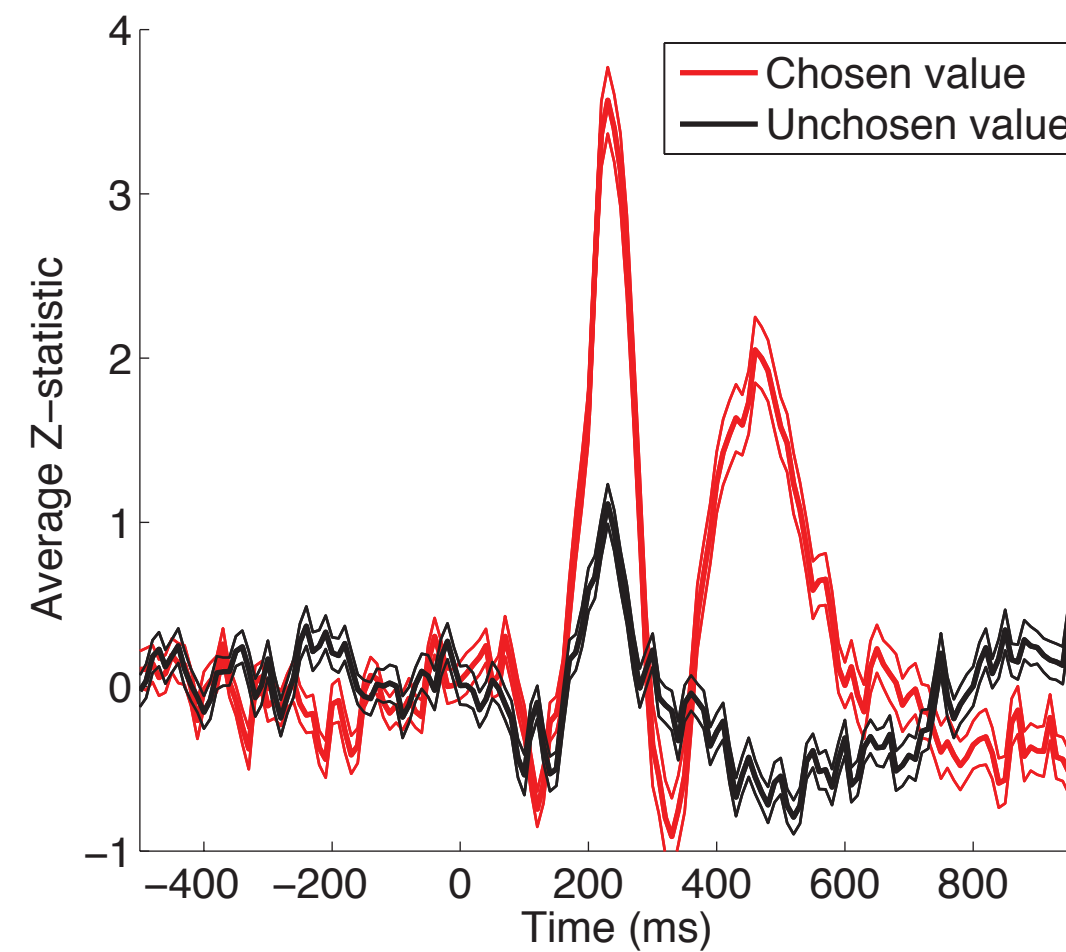

Supplement: supp [file elife_poa_e11945_Figure_1_figure_supplement_3.pdf › elife_poa_e11945_Figure_1_figure_supplement_3.pdf]

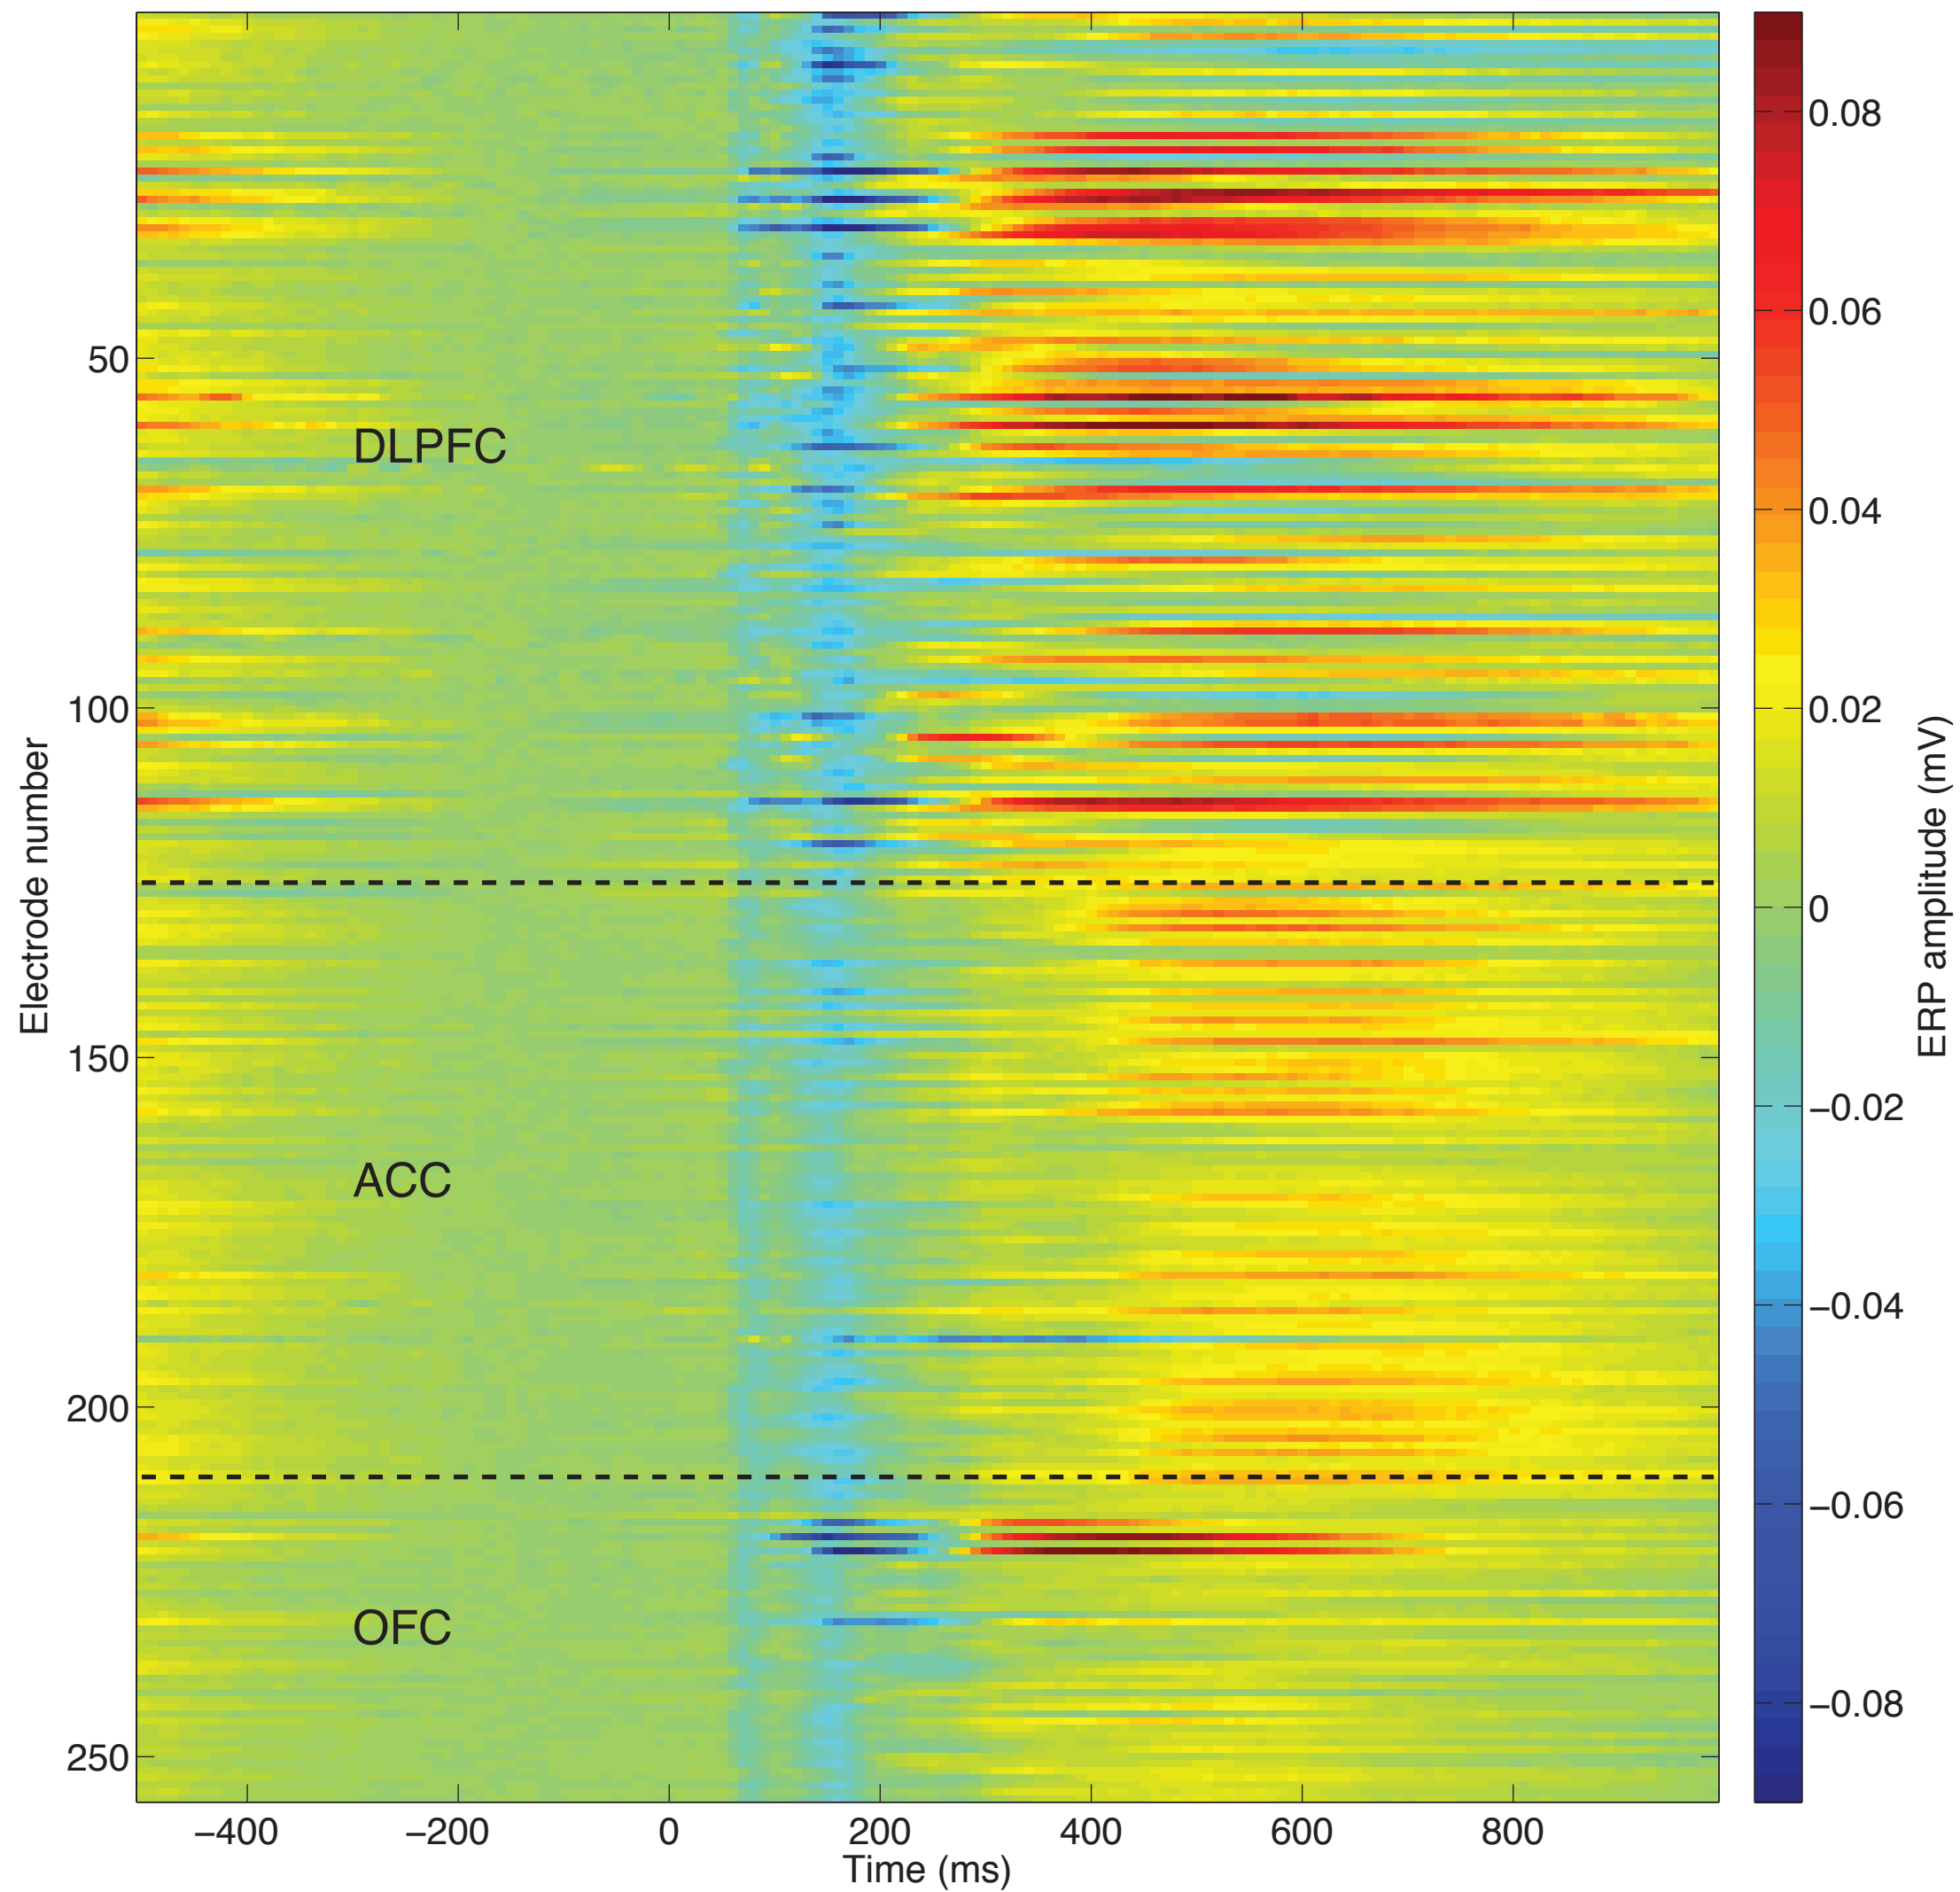

Supplement: supp [file elife_poa_e11945_Figure_2_figure_supplement_1.pdf › elife_poa_e11945_Figure_2_figure_supplement_1.pdf]

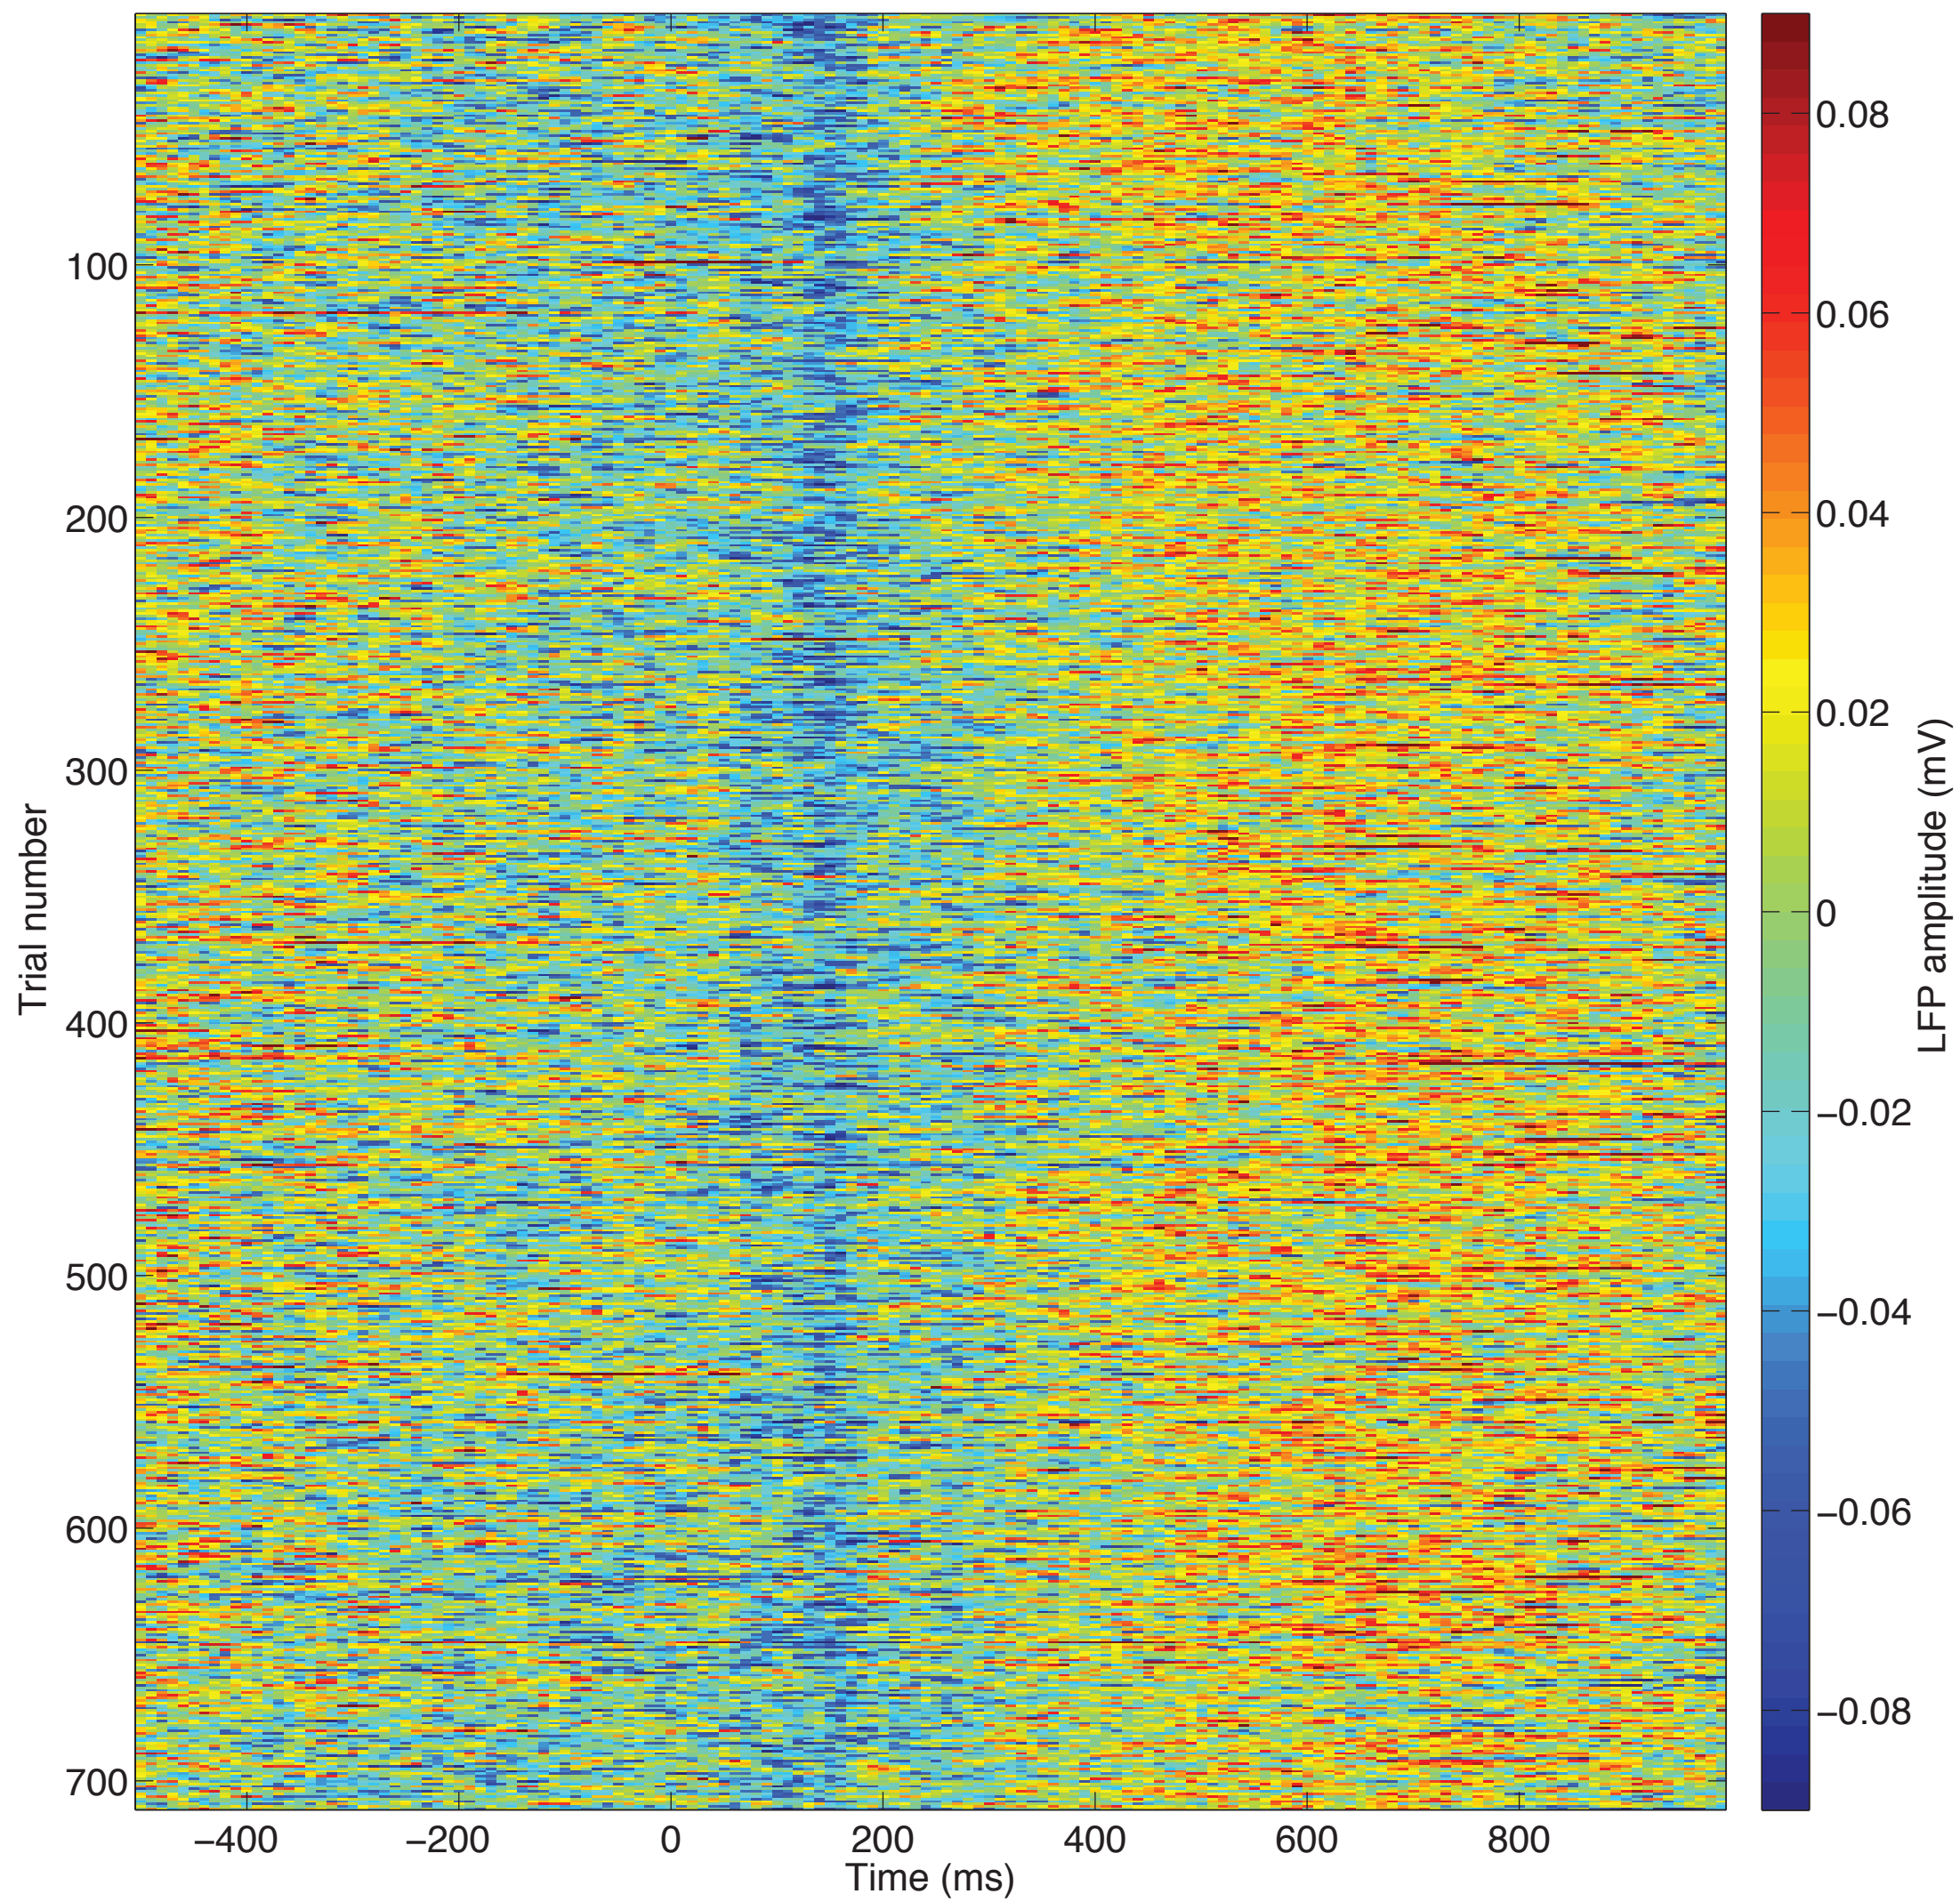

Supplement: supp [file elife_poa_e11945_Figure_2_figure_supplement_2.pdf › elife_poa_e11945_Figure_2_figure_supplement_2.pdf]

Regression of decision variables onto PC 2

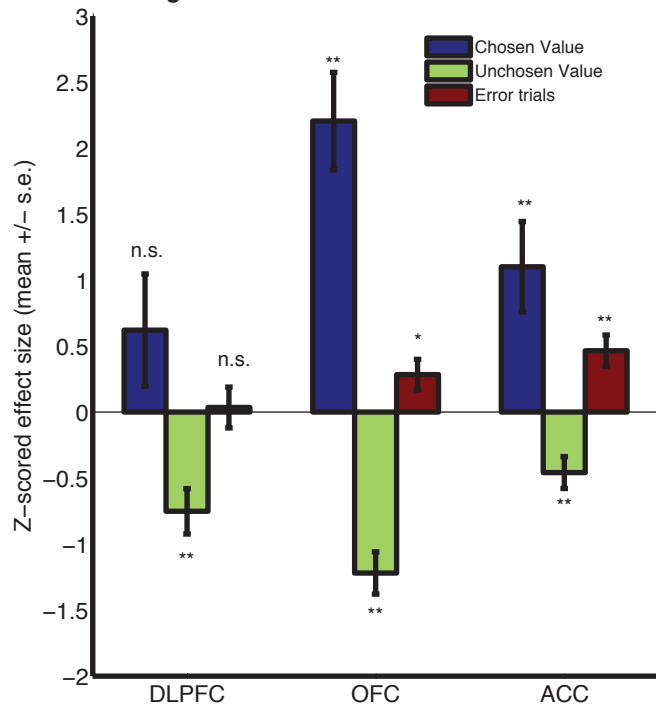

Regression of decision variables onto PC 1

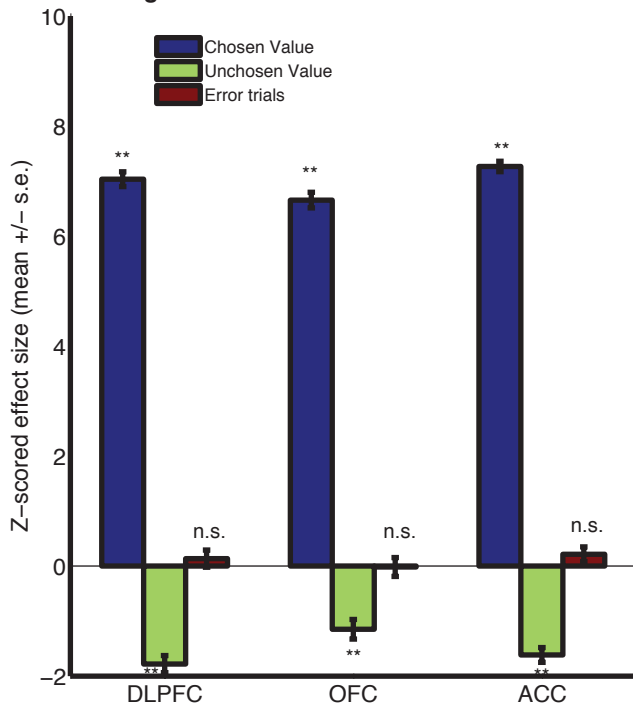

Supplement: supp [file elife_poa_e11945_Figure_2_figure_supplement_4.pdf › elife_poa_e11945_Figure_2_figure_supplement_4.pdf]

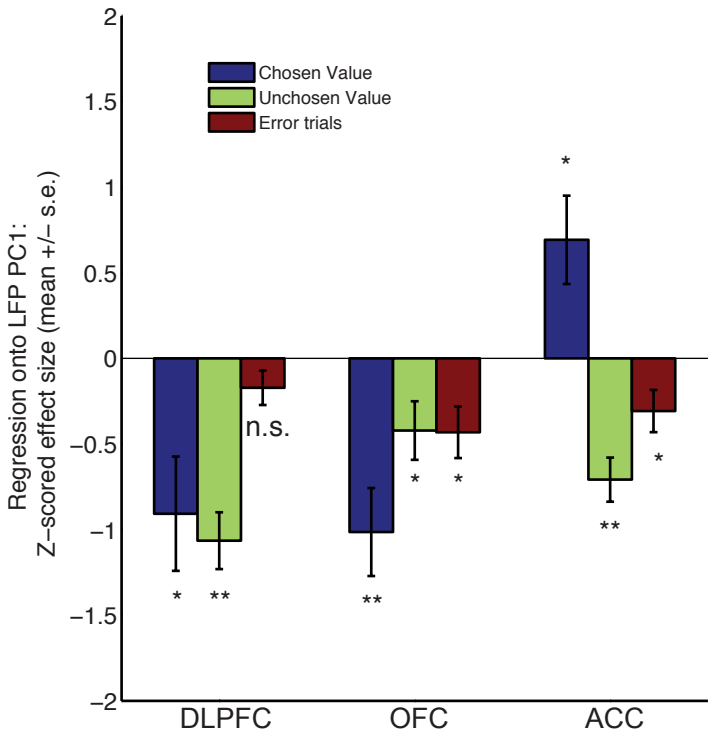

Supplement: supp [file elife_poa_e11945_Figure_2_figure_supplement_5.pdf › elife_poa_e11945_Figure_2_figure_supplement_5.pdf]

**DLPFC**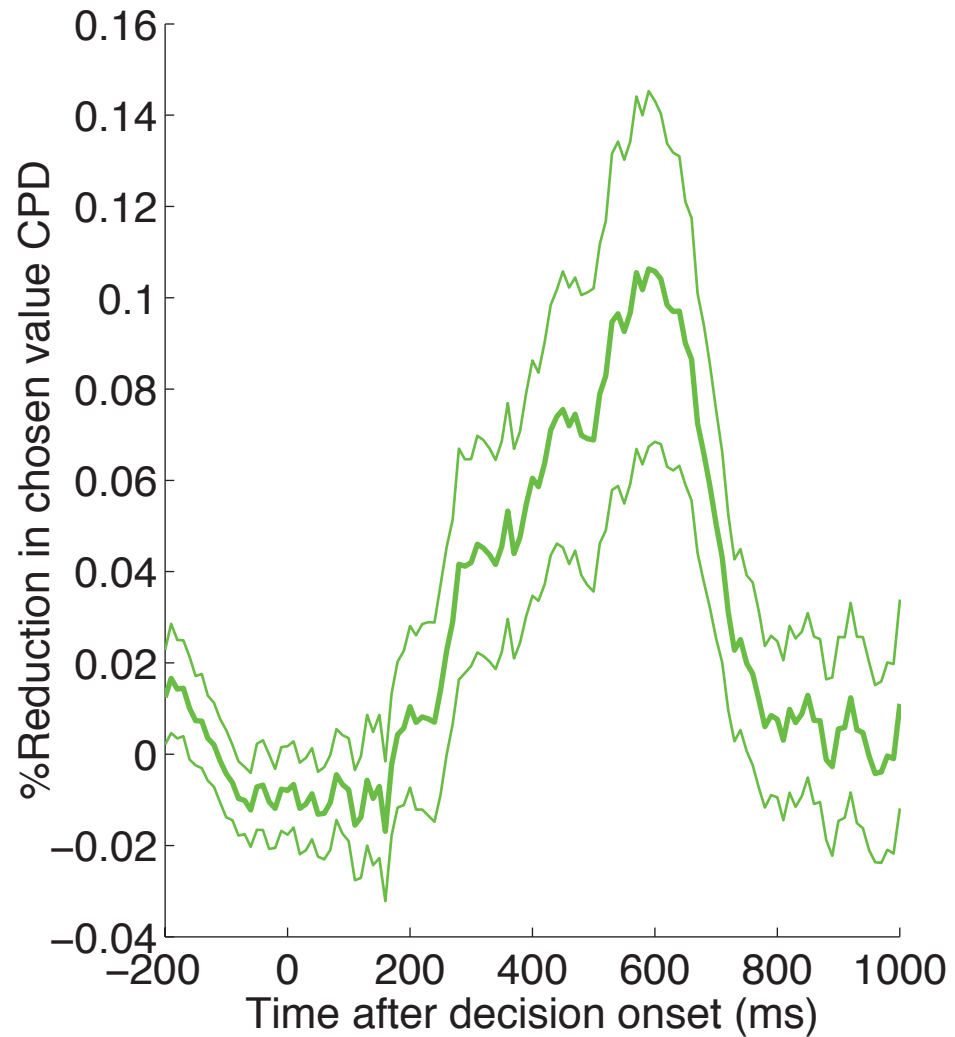**OFC**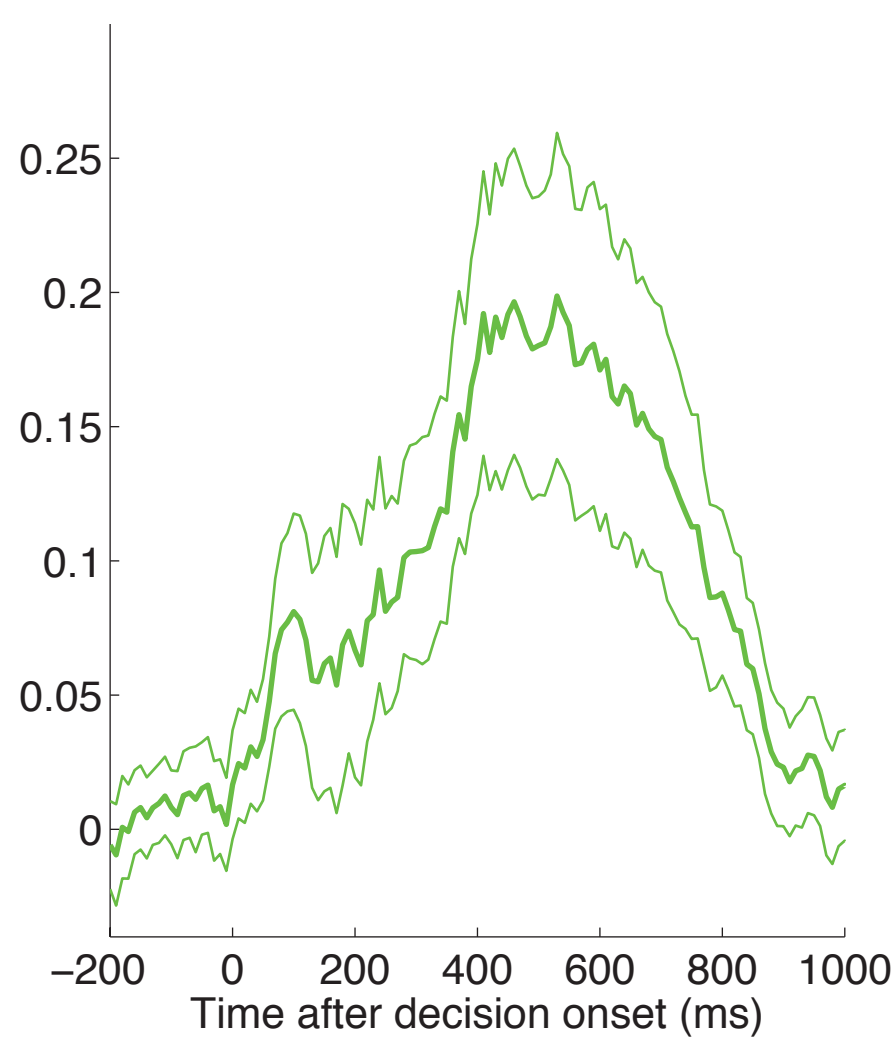**ACC**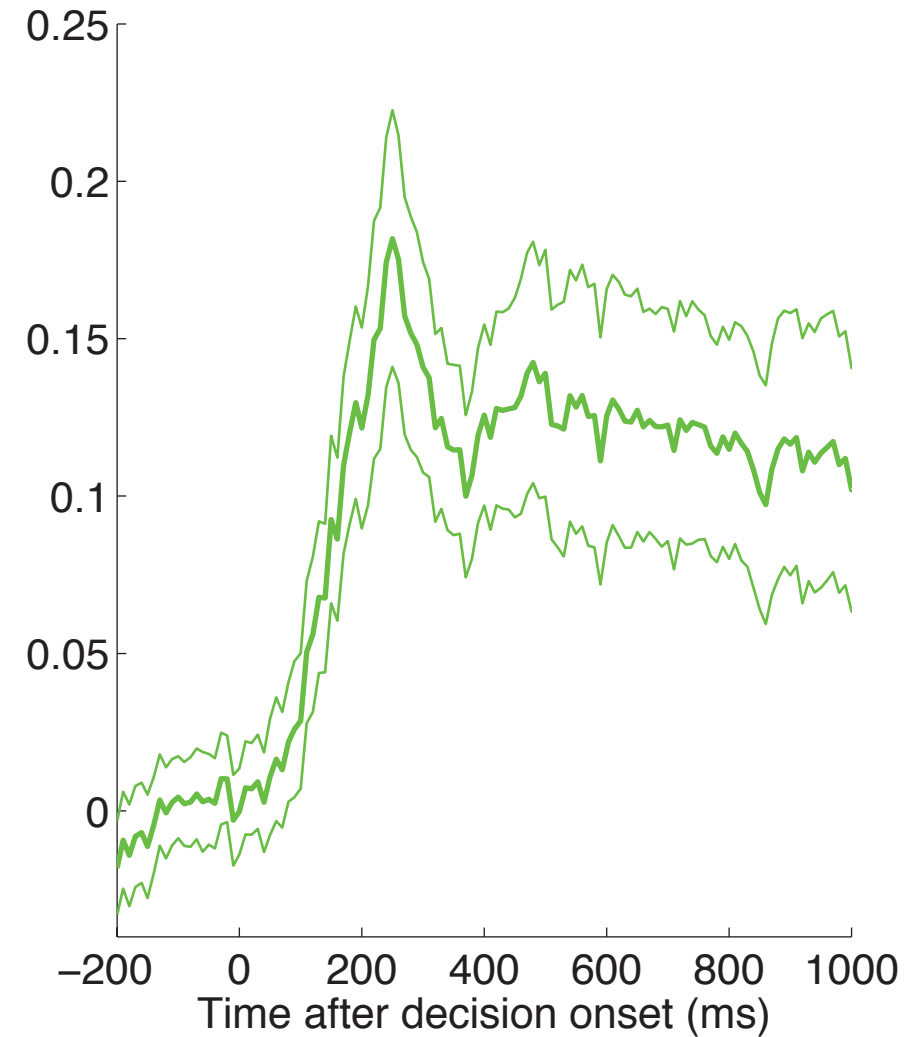

Supplement: supp [file elife_poa_e11945_Figure_4_figure_supplement_1.pdf › elife_poa_e11945_Figure_4_figure_supplement_1.pdf]

## Principal component 1

DLPFC

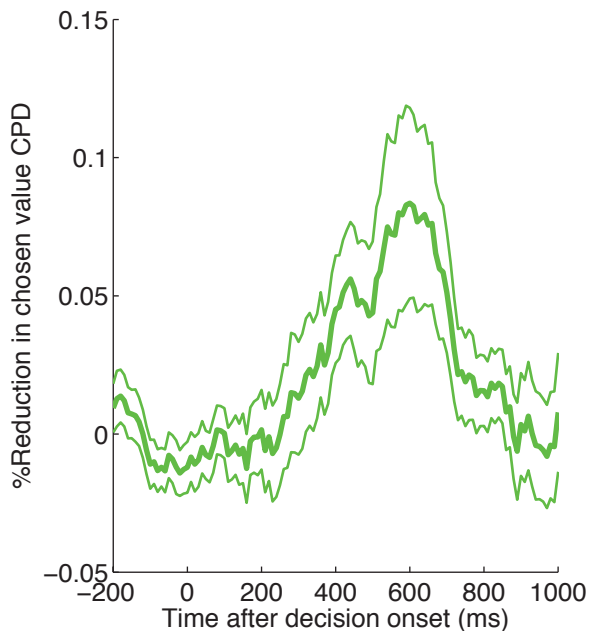

OFC

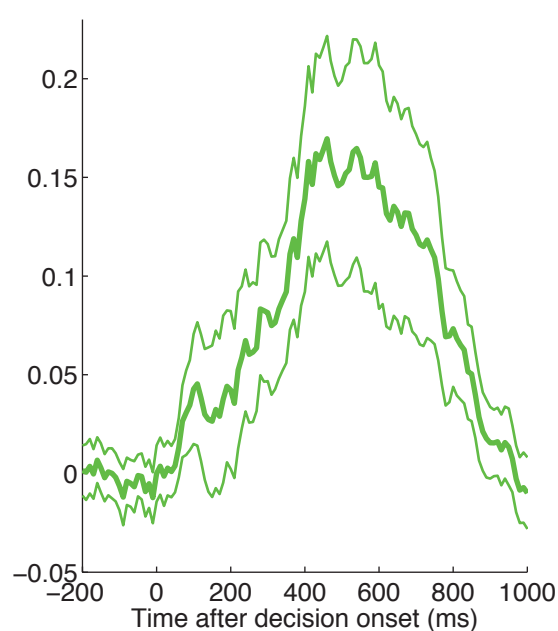

ACC

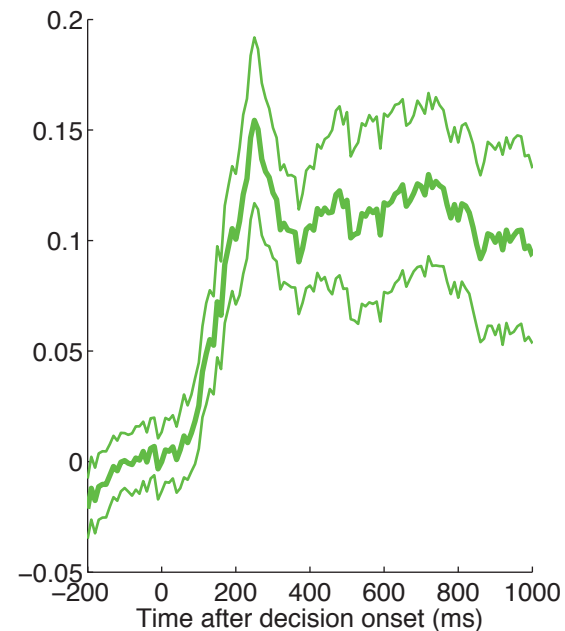

## Principal component 2

DLPFC

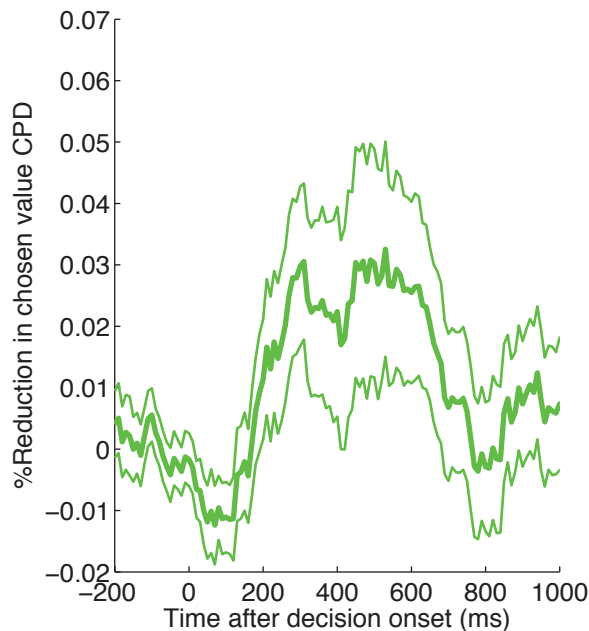

OFC

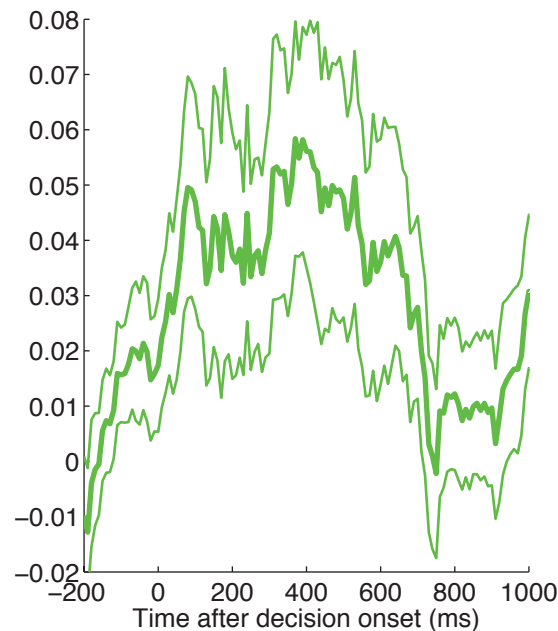

ACC

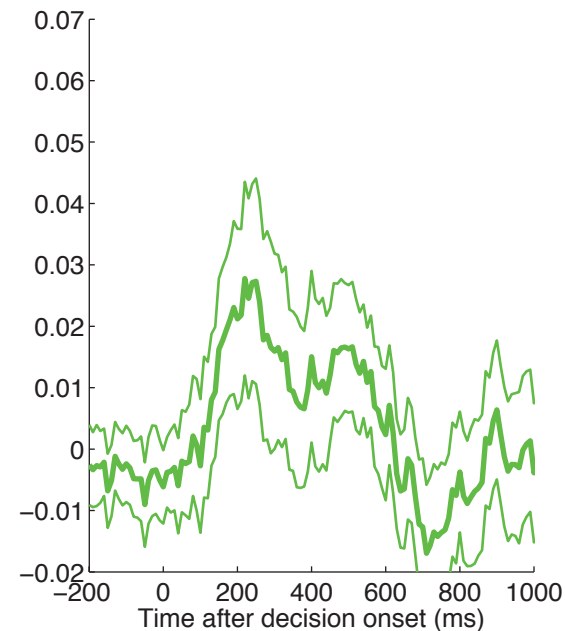

Supplement: supp [file elife_poa_e11945_Figure_4_figure_supplement_2.pdf › elife_poa_e11945_Figure_4_figure_supplement_2.pdf]

**A**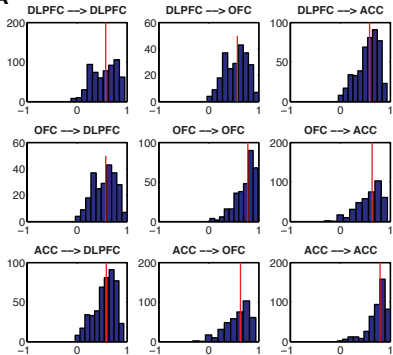**B**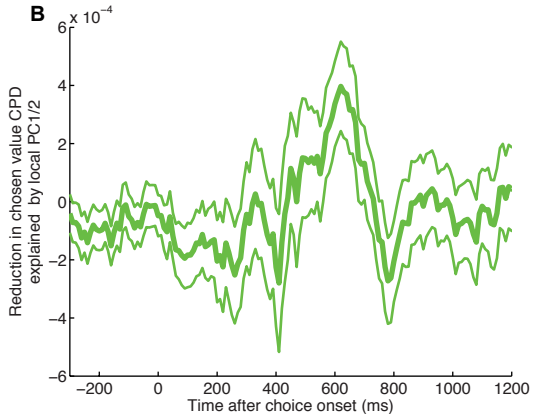

Supplement: supp [file elife_poa_e11945_Figure_4_figure_supplement_3.pdf › elife_poa_e11945_Figure_4_figure_supplement_3.pdf]

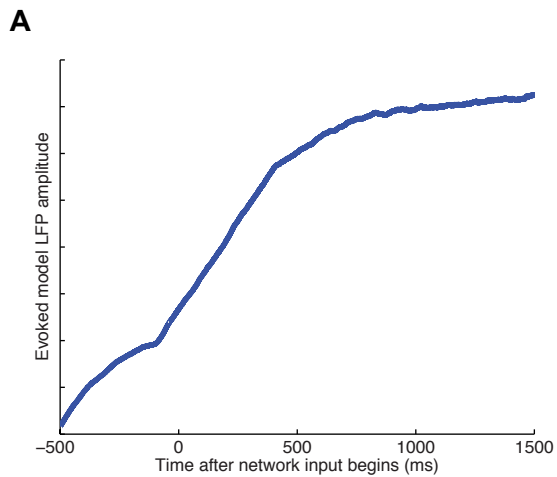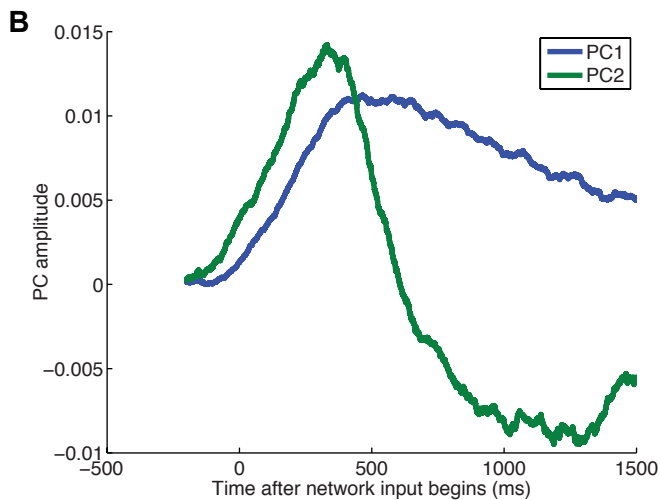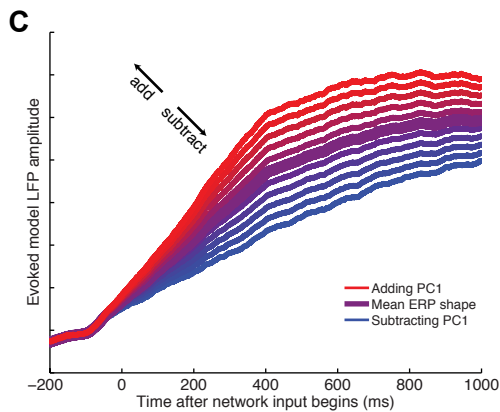

Supplement: supp [file elife_poa_e11945_Figure_7_figure_supplement_1.pdf › elife_poa_e11945_Figure_7_figure_supplement_1.pdf]
